# Supplementary material
Source: Springer Nature journal article supplement (https://www.springermedizin.de/resource/supplementary/12985_2010_844_MOESM4_ESM.pdf/9609322)

|                   | 1 | 2 | 3 | 4 | 5 | 6 | 7 | 8 | 9 |
|-------------------|---|---|---|---|---|---|---|---|---|
| Glutathione-Beads | + | + | + | + |   | - | + | + | - |
| GST-p42           | - | - | - | - | M | - | + | + | + |
| GST               | - | - | + | + |   | - | - | - | - |
| SARS-CoV NP       | + | - | + | - |   | + | - | + | - |

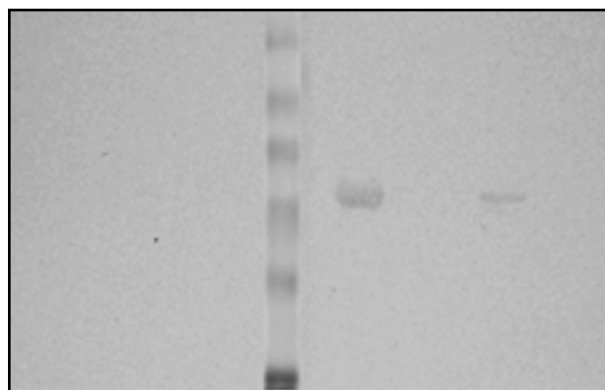

← SARS-CoV NP

Supplement: MOESM4 [file 9609322]
